# Supplementary material for: Network pharmacology for the identification of phytochemicals in traditional Chinese medicine for COVID-19 that may regulate interleukin-6
Source: PubMed Central journal article supplement (PMC7809559; doi:10.1042/bsr20202583), 2021-01-14
Supplement: BSR-2020-2583_supp.pdf [file BSR-2020-2583_supp.pdf]

**Supplementary Table 1.** Herbs in Jinhua Qinggan Granule, Lianhua Qingwen Capsule, Xuebijing Injection, Qingfei Paidu Decoction, XuanFeiBaiDu Granule HuaShiBaiDu Formula.

| Medicine name            | Ingredient                                                                                                                                                                                                                                                                                                                                                                                                                                                                                                                                                                                                                                                                                            |
|--------------------------|-------------------------------------------------------------------------------------------------------------------------------------------------------------------------------------------------------------------------------------------------------------------------------------------------------------------------------------------------------------------------------------------------------------------------------------------------------------------------------------------------------------------------------------------------------------------------------------------------------------------------------------------------------------------------------------------------------|
| Jinhua Qinggan Granules  | Jinhua Qinggan Granules: Jinyin hua(金银花, Lonicerae Japonicae Flos, Honeysuckle); Shigao(石膏, Gypsum moles Fibrosum, Gypsum Fibrosum); Mahuang(麻黄, Ephedra Herba, Ephedra); Kuxingren(苦杏仁, Amygdalus Communis Vas, Armeniaca Semen Amarum); Huangqin(黄芩, Scutellariae Radix, Scutellaria baicalensis); Lianqiao(连翘, Forsythiae Fructus, Fructus Forsythiae); Zhebeimu(浙贝母, Fritillariae Thunbergii Bulbus, Thunberg Fritillary Bulb); Zhimu(知母, Anemarrhenae Rhizoma, Rhizoma Anemarrhenae); Niubangzi(牛蒡子, Fructus Arctii, Arctii Fructus); Qinghao(青蒿, Artemisia Annua L, Artemisiae Annuae Herba); Bohe(薄荷, Menthae Herba, Menthae Haplocalycis Herba); Gancao(甘草, Licorice, Liquorice).             |
| Lianhua Qingwen Capsules | Lianhua Qingwen Capsules: Lianqiao(连翘, Forsythiae Fructus, Fructus Forsythiae); Jinyinhua(金银花, Lonicerae Japonicae Flos, Honeysuckle); Zhimahuang(炙麻黄, Ephedra, Ephedra); Kuxingren(苦杏仁, Amygdalus Communis Vas, Armeniaca Semen Amarum); Shigao(石膏, Gypsum moles Fibrosum, Gypsum Fibrosum); Banlangen(板蓝根, Isatidis Radix, Radix Isatidis); Mianmaguanzhong(绵马贯众, Male Fern Rhizoma, Male Fern Rhizome); Yuxingcao(鱼腥草, Houttuyniae Herba, Houttuynia cordata Thunb); Guanghuoxiang(广藿香, Pogostemon Cablin (Blanco) Benth, Patchouli); Dahuang(大黄, Rhei Radix Et Rhizoma, Chinese rhubarb); Hongjingtian(红景天, Rhodiola, Rhodiola); Bohenaol(薄荷脑, Menthol, Menthol); Gancao(甘草, Licorice, Liquorice) |
| Xuebijing Injection      | Honghua(红花, Carthami Flos, Safflower); Chishao(赤芍, Radix Paeoniae Rubra, Red Paeony Root); Chunaqiong(川穹, Chuanxiong Rhizoma, Sichuan lovase rhizome); Danshen(丹参, Salviae Miltiorrhizae Radix et Rhizoma, Dan-Shen Root); Danggui(当归, Angelicae Sinensis Radix, Angelica sinensis)                                                                                                                                                                                                                                                                                                                                                                                                                   |
| Qingfei Paidu Decoction  | Mahuang(麻黄, Ephedra Herba, Ephedra); 6g Zhigancao(炙甘草, Glycyrrhizae, Radix Glycyrrhizae Preparata); Kuxingren(苦杏仁, Amygdalus Communis Vas, Armeniaca Semen Amarum); Shengshigao(生石膏, Gypsum, Gypsum); Guizhi(桂枝, Cinnamomi Ramulus,                                                                                                                                                                                                                                                                                                                                                                                                                                                                   |

|                      |                                                                                                                                                                                                                                                                                                                                                                                                                                                                                                                                                                                                                                                                                                                                                                                                                                                                                                                                                          |
|----------------------|----------------------------------------------------------------------------------------------------------------------------------------------------------------------------------------------------------------------------------------------------------------------------------------------------------------------------------------------------------------------------------------------------------------------------------------------------------------------------------------------------------------------------------------------------------------------------------------------------------------------------------------------------------------------------------------------------------------------------------------------------------------------------------------------------------------------------------------------------------------------------------------------------------------------------------------------------------|
|                      | <p>Ramulus cinnamomi); Zexie(泽泻, Alismatis Rhizoma, Alisma Orientale); Zhuling(猪苓, Polyporus, Polyporus); Baizhu(白术, Atractylodis Macrocephalae Rhizoma, Largehead Atractylodes Rh); Fuling(茯苓, Poria, Indian Buead Tuckahoe); Chaihu(柴胡, Bupleuri Radix, Chinese Thorowax Root); Huangqin(黄芩, Scutellariae Radix, Scutellaria baicalensis); Jiangbanxia(姜半夏, Pinelliae Rhizoma Praeparatum cum Zingibere et Alumine; Rhizome Pinelliae Preparata); Shengjiang(生姜, Zingiber officinale Roscoe, Ginger); Ziyuan(紫苑, Asteris Radix et Rhizoma, Tatarian Aster Root); Kuandonghua(款冬花, Farfarae Flos, Flos Farfaraes); Shegan(射干, Belamcandae Rhizome, Rhizoma Belamcandae); Xixin(细辛, Asari Radix Et Rhizoma, Manchurian Wildginger); Shanyao(山药, Rhizoma Dioscoreae, Rhizoma Dioscoreae); Zhishi(枳实, Aurantii Fructus Immaturus, Fructus Aurantii Immaturus); Chenpi(陈皮, Citrus Reticulata, Tangerine Peel); Huoxiang(藿香, Herba Agastachis, Ageratum)</p> |
| XuanFeiBaiDu Granule | <p>Shengmahuang(生麻黄, Ephedrae Herba, Chinese Ephedra Herb); Kuxingren(苦杏仁, Amygdalus Communis Vas, Armeniacae Semen Amarum); Shengshigao(生石膏, Gypsum, Gypsum); Shengyiyiren(生薏苡仁, Semen Coicis, Coix Seed); Maocangshu(茅苍术, Rhizoma Atractylodis Lanceae, Swordlike Atractylodes Rhizome); Guanghuoxiang(广藿香, Pogostemon Cablin (Blanco) Benth, Patchouli); Qinghaocao(青蒿草, Artemisia Annu L, Artemisiae Annuae Herba); Huzhang(虎杖, Polygoni Cuspidati Rhizoma Et Radix, Polygonum cuspidatum); Mabiancao(马鞭草, Verbenae Herb, Herba Verbenae); Ganmaogen(干茅根, Radix Couchgrass, Couchgrass root); Tinglizi(葶苈子, Lepidii Semen Descurainiae Semen, Pepperweed Seed); Huajuhong(化橘红, Citri Grandis Exocarpium, Pummelo Peel); Shenggancao(生甘草, Glycyrrhizae, Raw licorice)</p>                                                                                                                                                                             |
| HuaShiBaiDu Formula  | <p>Shengmahuang(生麻黄, Ephedrae Herba, Chinese Ephedra Herb); Xingren(杏仁, Amygdalus Communis Vas, Apricot Kernel); Shengshigao(生石膏, Gypsum, Gypsum); Gancao(甘草, Licorice, Liquorice); Huoxiang(藿香, Herba Agastachis, Ageratum); Houpu(厚朴, Magnolia Officinalis Rehd Et Wils, Cortex Magnoliae Officinalis); Cangzhu(仓术, Atractylodes Lancea (Thunb.) Dc, Rhizoma Atractylodis); Caoguo(草果,</p>                                                                                                                                                                                                                                                                                                                                                                                                                                                                                                                                                             |

|  |                                                                                                                                                                                                                                                                                                                                                                                                                    |
|--|--------------------------------------------------------------------------------------------------------------------------------------------------------------------------------------------------------------------------------------------------------------------------------------------------------------------------------------------------------------------------------------------------------------------|
|  | Amomum Tsao-Ko Crevostet, Tsaoko Amomum Fruit);<br>Fabanxia(法半夏, Rhizoma Pinelliae, Rhizoma Pinelliae<br>Preparatum); Fuling(茯苓, Poria, Indian Buead<br>Tuckahoe); Shengdahuang(生大黄, Rhei Radix Et<br>Rhizoma, Chinese rhubarb); Shenghuangqi(生黄芪,<br>Astragali Radix, Milkvetch Root); Tinglizi(葶苈子,<br>Lepidii Semen Descurainiae Semen, Pepperweed Seed);<br>Chishao(赤芍, Radix Paeoniae Rubra, Red Paeony Root) |
|--|--------------------------------------------------------------------------------------------------------------------------------------------------------------------------------------------------------------------------------------------------------------------------------------------------------------------------------------------------------------------------------------------------------------------|
